# Supplementary material for: Metal–metal bonded pentamolybdate hybrids as electron storage materials
Source: Royal Society of Chemistry journal article supplement (doi:10.1039/d3dt02068a), 2023-01-01
Supplement: d3dt02068a1.pdf [file d3dt02068a1.pdf]

## Supporting Information

### **Metal-metal bonded pentamolybdate hybrids as electron storage material**

Meng Cao,<sup>a,b</sup> Jie Zi,<sup>b</sup> Ruili Sang\*<sup>b</sup> and Li Xu\*<sup>b,c</sup>

<sup>a</sup>College of Chemistry and Materials Science, Fujian Normal University, Fuzhou, Fujian 350007, China.

<sup>b</sup>State Key Laboratory of Structural Chemistry, Fujian Institute of Research on the Structure of Matter, Chinese Academy of Sciences, Fuzhou, Fujian, 350002, China.

<sup>c</sup>Fujian College, University of Chinese Academy of Science, Fuzhou, Fujian, 350002, China.

E-mail: xli@fjirsm.ac.cn

## Contents

|                                                                       |    |
|-----------------------------------------------------------------------|----|
| 1. Materials and Syntheses.....                                       | 3  |
| 2. Instruments and Physical Measurements .....                        | 4  |
| 3. Crystallographic data .....                                        | 6  |
| 4. Molecular and crystal structures .....                             | 7  |
| 5. Band valance sum (BVS) calculations and average bond lengths ..... | 11 |
| 6. Spectroscopic characterizations .....                              | 12 |
| 6.1 TGA .....                                                         | 12 |
| 6.2 IR Spectra.....                                                   | 13 |
| 6.3 PXRD.....                                                         | 14 |
| 6.4 XPS .....                                                         | 15 |
| 6.5 UV-vis .....                                                      | 16 |
| 7. Frontier and metal-metal bonding orbitals .....                    | 17 |
| 8. Electrochemical characterizations.....                             | 20 |
| 9. The xyz coordinates of computationally studied models. ....        | 24 |
| References.....                                                       | 34 |

## 1. Materials and Syntheses

**Materials:** All chemical reagents and drugs were purchased directly for use without further isolation and purification. The precursors  $[\text{Mo}_3\text{O}_2(\text{O}_2\text{CCH}_3)_6(\text{H}_2\text{O})_3]\text{ZnCl}_4 \cdot 8\text{H}_2\text{O}$  was prepared according to the literature method.<sup>1-3</sup>

### Preparation of 2D- $[\text{Mo}^{\text{IV}}_3\text{Mo}^{\text{VI}}_2\text{O}_{10}\text{Sr}_2(\text{H}_2\text{O})_5(\text{C}_6\text{H}_4\text{O}_7)_2\text{py}_3] \cdot 3.5\text{H}_2\text{O}$ (1):

A mixture of  $[\text{Mo}_3\text{O}_2(\text{O}_2\text{CCH}_3)_6(\text{H}_2\text{O})_3]\text{ZnCl}_4 \cdot 8\text{H}_2\text{O}$  precursors (0.1 g, 0.1 mmol),  $\text{SrCO}_3$  (0.015 g, 0.10 mmol), citric acid ( $\text{C}_6\text{H}_8\text{O}_7$ ) (0.015 g, 0.08 mmol),  $\text{H}_2\text{O}$  (2 ml) and pyridine (8 ml) were sealed in a 20 ml Teflon-lined stainless-steel reactor and heated to 393 K for three days. Then the reactor was cooled to room temperature at 2 K/h to produce yellow flake crystals of **1**. (>40% yield based on Mo). Anal. Calc. for  $\text{C}_{27}\text{H}_{40}\text{Mo}_5\text{N}_3\text{O}_{32.5}\text{Sr}_2$  (Mr.=1581.56): C, 20.50%; H, 2.55%; N, 2.65%; Sr, 11.08%; Mo, 30.33%; Found: C, 21.04%; H, 2.63%; N, 2.81%; Sr, 9.7%; Mo, 28.40%. IR (KBr,  $\text{cm}^{-1}$ ): 3472 (m, O-H, N-H), 1641-1606 (s, O-H, N-H), 1404 (s, C-H), 1067-1222 (w, C-N, C-C), 926 (m, Mo=O<sub>t</sub>), 733-873 (s, Mo-O<sub>b</sub>-Mo), 643 (w, Mo-O<sub>b</sub>-Mo). CCDC No. 2261568.

### Preparation of 1D- $[\text{Mo}^{\text{IV}}_3\text{Mo}^{\text{VI}}_2\text{O}_{10}\text{Sr}(\text{H}_2\text{O})_3(\text{C}_6\text{H}_4\text{O}_7)_2\text{py}_3] \cdot \text{py} \cdot 2[\text{NH}_2(\text{CH}_3)_2] \cdot 2\text{H}_2\text{O}$ (2):

A mixture of  $[\text{Mo}_3\text{O}_2(\text{O}_2\text{CCH}_3)_6(\text{H}_2\text{O})_3]\text{ZnCl}_4 \cdot 8\text{H}_2\text{O}$  precursors (0.1 g, 0.1 mmol),  $\text{SrCO}_3$  (0.015 g, 0.10 mmol), citric acid ( $\text{C}_6\text{H}_8\text{O}_7$ ) (0.015 g, 0.08 mmol),  $\text{H}_2\text{O}$  (1 ml), DMF (0.5 ml) and pyridine (9 ml) were sealed in a 20 ml Teflon-lined stainless-steel reactor and heated to 393 K for two days. Then the reactor was cooled to room temperature at 2 K/h to produce yellow block crystals of **2**. (>40% yield based on Mo) Anal. Calc. for  $\text{C}_{36}\text{H}_{54}\text{Mo}_5\text{N}_6\text{O}_{29}\text{Sr}$  (Mr.=1602.17): C, 27.12%; H, 2.91%; N, 5.27%; Sr, 5.50%; Mo, 30.09%; Found: C, 25.96%; H, 3.26%; N, 4.61%; Sr, 5.30%; Mo, 30.24%. IR (KBr,  $\text{cm}^{-1}$ ): 3449 (s, O-H, N-H), 1635 (s, O-H, N-H), 1401 (s, C-H), 1067-1220 (w, C-N, C-C), 917 (m, Mo=O<sub>t</sub>), 725-882 (s, Mo-O<sub>b</sub>-Mo), 643 (w, Mo-O<sub>b</sub>-Mo). CCDC No. 2261583.

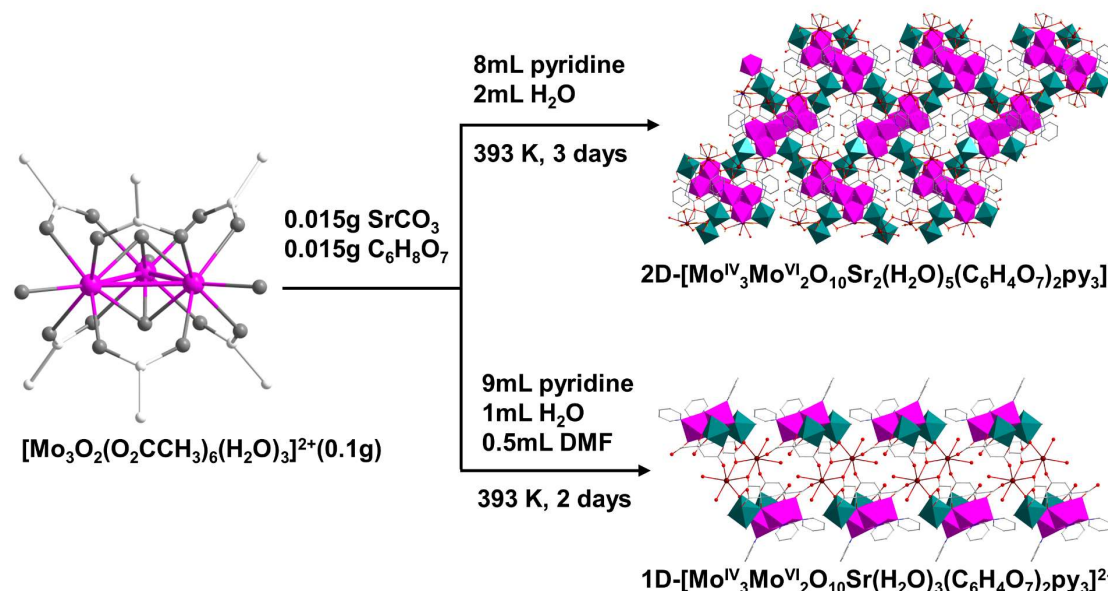

**Scheme 1.** Synthesis of the hybrid-POM1 and hybrid-POM2 through the solvothermal oxidation aggregation of  $[\text{Mo}_3\text{O}_2(\text{O}_2\text{CCH}_3)_6(\text{H}_2\text{O})_3]\text{ZnCl}_4$  at different reaction conditions.

## 2. Instruments and Physical Measurements

### General information:

Elemental analyses for C, H and N were performed with a vario MICRO elemental analyzer, and inductively coupled plasma photoemission spectroscopy for metals Mo and Sr was performed with an Avio220Max. IR spectra were obtained on a vertex X70 infrared spectrometer using KBr pellets with a measurement range of 4000-400  $\text{cm}^{-1}$ . The X-ray photoelectron spectroscopy (XPS) measurements were carried out on an ESCALAB 250Xi spectrometer equipped with an Al  $K\alpha$ -ray source. The C 1s signal (284.8 eV) is used as the reference calibration binding energy. Thermogravimetric analysis (TGA) was performed on the STA449C thermal analyzer under  $\text{N}_2$  flow with 10  $^\circ\text{C}/\text{min}$  heating. Solid UV-visible spectra were collected on a Perkin-Elmer Lambda-950 spectrophotometer in the wavelength range of 200-800 nm. Powder X-ray diffraction (PXRD) was performed on a Miniflex 600 powder diffraction instrument.

### Single-crystal X-ray structure analysis:

Single crystal X-ray diffraction data of **1** and **2** were recorded on a Bruker D8-venture diffractometer ( $\lambda$  (Mo  $K\alpha$ ) = 0.71073 Å) at low temperature (170K/150K) equipped with a graphite monochromator. All absorption corrections were performed using multi-scan. The structures were solved by direct methods and refined by full-matrix least-squares on  $F^2$  with the SHELXTL-2016 program package.<sup>4</sup> The CCDC No. 2261568 (for **1**) and CCDC No. 2261583 (for **2**) contains the supplementary crystallographic data for this paper. These data can be obtained free of charge from The Cambridge Crystallographic Data Centre via [www.ccdc.cam.ac.uk/data\\_request/cif](http://www.ccdc.cam.ac.uk/data_request/cif).

### Electrochemical measurements:

The collected crystalline samples were dried at 130  $^\circ\text{C}$  under argon flow for 12 hours to remove lattice water molecules. The cathode material was prepared by dispersing adequately dried active material (**1** and **2**), acetylene black and poly (vinyl difluoride) (PVDF) binder with a weight ratio of 3:5:2 in a suitable amount of solvent of N-methyl-2-pyrrolidone (NMP) to form homogeneous slurries under vigorous stir, then pasting onto aluminum foil. The obtained cathodes were dry at the temperature of 105  $^\circ\text{C}$  under vacuum for 12 hours. The mass loading of the active material on the Al foil is about 0.3-0.4 mg. Such a cathode round piece (radius=7 mm), a celgard 2500 separator, a lithium foil as anode and the electrolyte of 1M  $\text{LiPF}_6$  in ethylene carbonate (EC)/diethyl carbonate (DEC) (1:1,  $v/v$ ), were sealed into a CR2032-type coin cell, in an argon-filled glovebox. Galvanostatic charge/discharge measurements were performed on a Neware Battery testing system (CT-4008Tn, Shengzhen, China) at different current densities in the voltage range of 1.5-4.0 V (vs.  $\text{Li}/\text{Li}^+$ ). Cyclic voltammetry (CV) curves were obtained with the CHI 660e electrochemical workstation (Shanghai, China). Electrochemical impedance spectroscopy (EIS) was performed on the CHI 660e electrochemical workstation (Shanghai, China).

### Conductivity measurement:

The electrical conductivity measurement method in this work is referenced to the published paper.<sup>5</sup> The testing thin pellets samples were prepared by vacuum drying the powder samples at 90  $^\circ\text{C}$  for 12 hours and then die-pressing powder samples (about 3-5 mg) with a pressure of 10 MPa. The obtained thin pellets samples, with a diameter of 2.5 mm and a thickness of about 1.0 mm, and then were coated with conductive silver on both sides and electrical contacts were made using gold wires. The prepared samples were dried at 60  $^\circ\text{C}$  under vacuum for 10 hours and then the electrical conductivity measurement was conducted. The conductivity of the thin sample particle is measured with the KEITHLEY 4200-SCS semiconductor parameter analyzer using the

DC two-terminal method. The bulk electrical conductivity of **1** and **2** was calculated by the following equation.

$$\sigma = \frac{l \times G}{S}$$

Where  $\sigma$  is electrical conductivity of the sample ( $\text{S cm}^{-1}$ ),  $l$  is thickness of sample (cm),  $S$  is contact area ( $\text{cm}^2$ ), and  $G$  is the conductance obtained from the current versus voltage curves.

**Details of Theoretical calculation:**

First-principles density functional theory (DFT)<sup>6</sup> calculations were performed using the GAUSSIAN16 package<sup>7</sup> at the B3LYP/Lanl2DZ<sup>8</sup> level for structure of **1**, **2** and  $[\text{Mo}_3\text{O}_4(\text{C}_2\text{O}_4)_3(\text{Mepy})_3]^{2-}$ . The Lanl2DZ<sup>9</sup> pseudopotential were used for Mo and Sr metal atoms, the 6-31\*G<sup>10</sup> basis set for the rest of the atoms (C, H, O and N). In all the calculations, a closed-shell singlet state was assumed and spin-restricted MOs was used.

### 3. Crystallographic data

**Table S1.** X-ray crystallographic data for **1** and **2**.

| Compound                             | <b>1</b>                                                                                         | <b>2</b>                                                                          |
|--------------------------------------|--------------------------------------------------------------------------------------------------|-----------------------------------------------------------------------------------|
| Empirical formula                    | C <sub>27</sub> H <sub>40</sub> Mo <sub>5</sub> N <sub>3</sub> O <sub>32.5</sub> Sr <sub>2</sub> | C <sub>36</sub> H <sub>54</sub> Mo <sub>5</sub> N <sub>6</sub> O <sub>29</sub> Sr |
| Formula weight                       | 1581.56                                                                                          | 1602.17                                                                           |
| Temperature                          | 170(2) K                                                                                         | 150(2) K                                                                          |
| Wavelength                           | 0.71073 Å                                                                                        | 0.71073 Å                                                                         |
| Crystal system                       | Monoclinic                                                                                       | Triclinic                                                                         |
| Space group                          | <i>P</i> 2 <sub>1</sub> / <i>c</i>                                                               | <i>P</i> $\bar{1}$                                                                |
| Unit cell dimensions                 | a = 16.1134(16) Å                                                                                | a = 10.6907(6) Å                                                                  |
|                                      | b = 15.6367(11) Å                                                                                | b = 15.5420(11) Å                                                                 |
|                                      | c = 18.9562(17) Å                                                                                | c = 17.3408(11) Å                                                                 |
|                                      | $\alpha$ = 90°                                                                                   | $\alpha$ = 67.740(2)°                                                             |
|                                      | $\beta$ = 106.944(4)°                                                                            | $\beta$ = 79.773(2)°                                                              |
| Volume                               | 4568.9(7) Å <sup>3</sup>                                                                         | 2610.1(3) Å <sup>3</sup>                                                          |
|                                      | Z                                                                                                | 4                                                                                 |
| Density (calculated)                 | 2.299 g/cm <sup>3</sup>                                                                          | 2.039 g/cm <sup>3</sup>                                                           |
| Absorption coefficient               | 3.752 mm <sup>-1</sup>                                                                           | 2.276 mm <sup>-1</sup>                                                            |
| F(000)                               | 3076                                                                                             | 1584                                                                              |
| $\theta$ range                       | 2.246 to 25.719°.                                                                                | 2.180 to 27.536°.                                                                 |
| Index ranges                         | -19 19, -19 19, -23 23                                                                           | -13 13, -20 19, -22 21                                                            |
| Reflections collected                | 40951                                                                                            | 32233                                                                             |
| Independent reflections              | 8655 [R(int) = 0.0797]                                                                           | 11925 [R(int) = 0.0394]                                                           |
| Completeness                         | 99.8 %                                                                                           | 99.3 %                                                                            |
| Refinement method                    | Full-matrix least-squares on F <sup>2</sup>                                                      | Full-matrix least-squares on F <sup>2</sup>                                       |
| restraints / parameters              | 7 / 631                                                                                          | 63 / 689                                                                          |
| Goodness-of-fit on F <sup>2</sup>    | 1.028                                                                                            | 0.997                                                                             |
| Final R indices [I > 2 $\sigma$ (I)] | R1 = 0.0375, wR2 = 0.0954                                                                        | R1 = 0.0409, wR2 = 0.1040                                                         |
| R indices (all data)                 | R1 = 0.0464, wR2 = 0.1014                                                                        | R1 = 0.0496, wR2 = 0.1103                                                         |

$$R_1 = \frac{\sum ||F_o| - |F_c||}{\sum |F_o|}; wR_2 = \left\{ \frac{\sum [w(F_o^2 - F_c^2)^2]}{\sum [w(F_o^2)^2]} \right\}^{1/2}$$

#### 4. Molecular and crystal structures

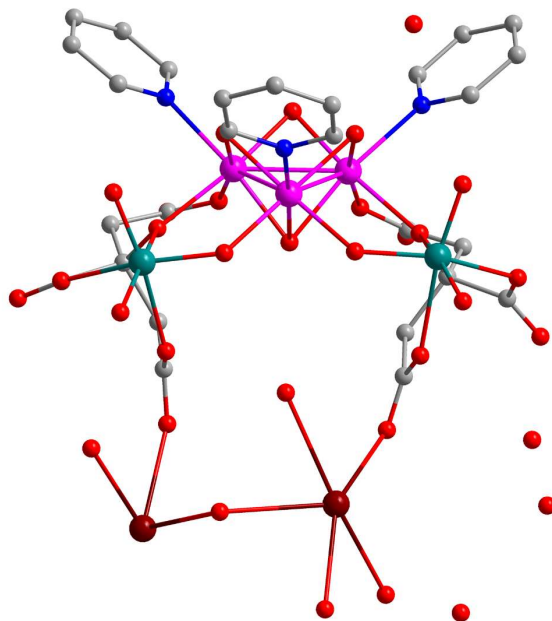

**Figure S1.** View of the asymmetric unit of **1**, all hydrogen atoms are omitted for clarity.

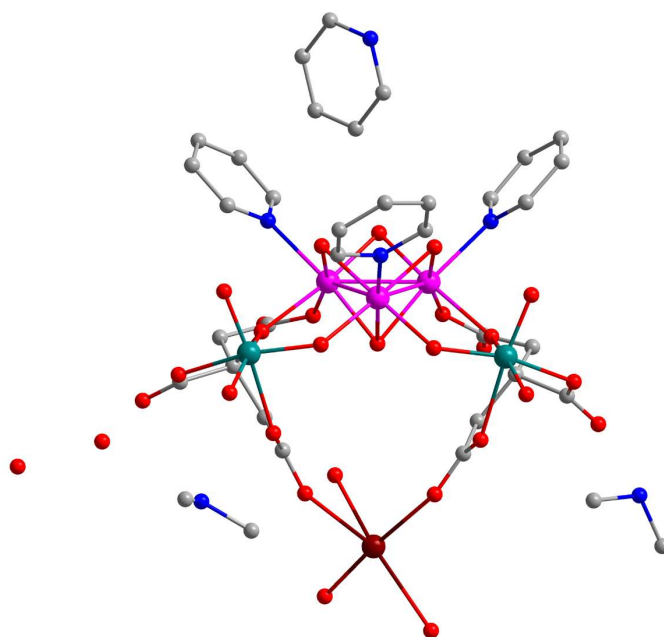

**Figure S2.** View of the asymmetric unit of **2**, all hydrogen atoms are omitted for clarity.

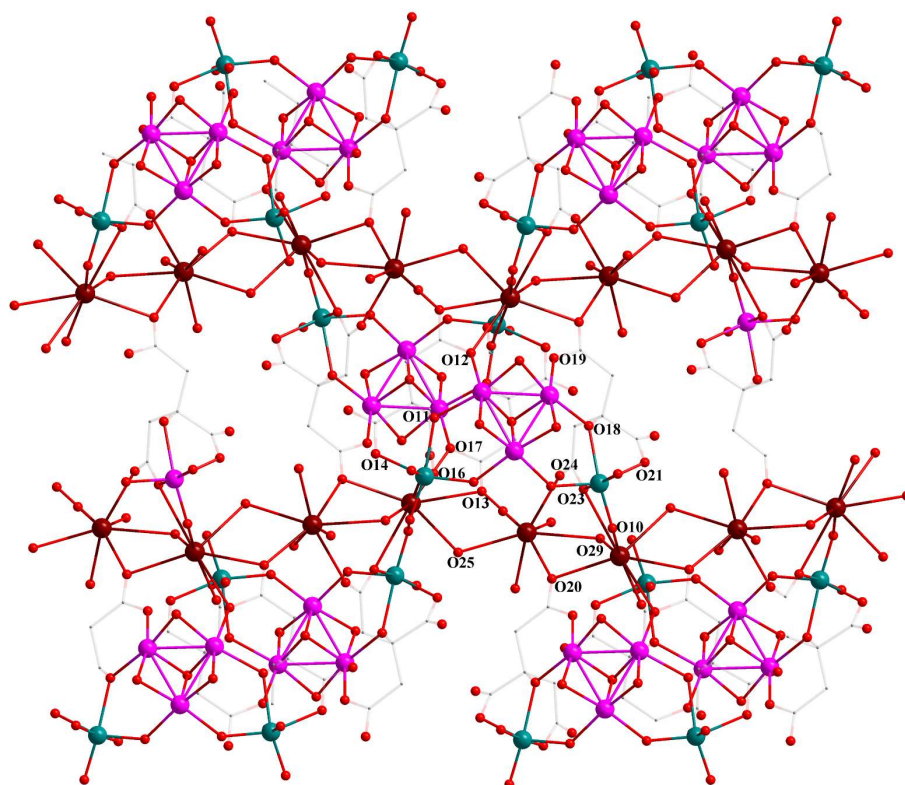

**Figure S3.** Schematic representation of the formation of the two-dimensional structure of **1**. Color code: Mo<sup>IV</sup>, pink; Mo<sup>VI</sup>, teal; Sr, dark red; N, blue; O, red; C, gray (pyridine six-membered rings are omitted and citrate ligands made transparent for clarity).

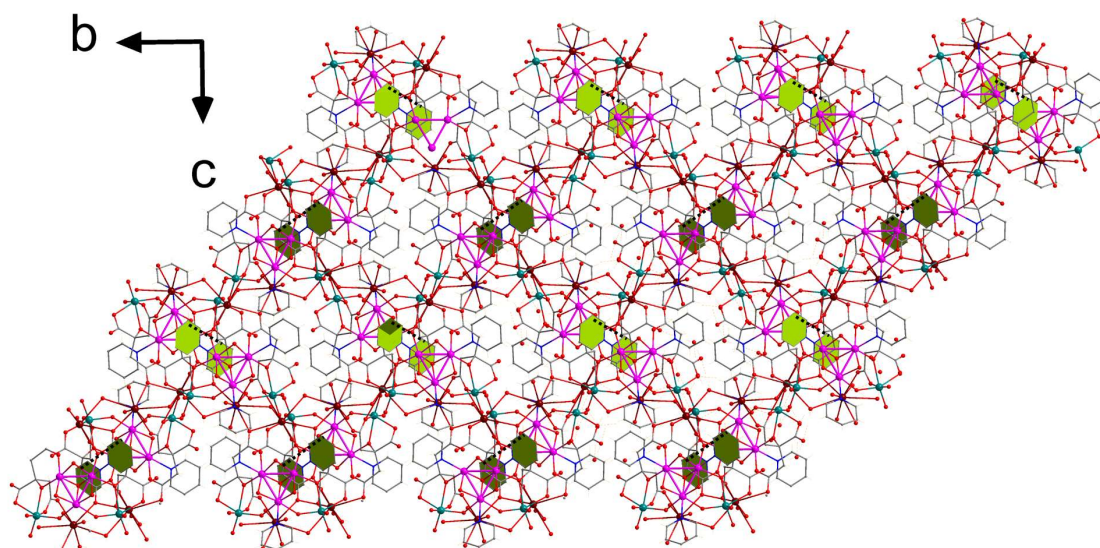

**Figure S4.** The 3D supramolecular structure of **1** achieved by  $\pi$  slipped stacking interactions between pyridine molecules (six membered rings with green shade). Color code: Mo<sup>IV</sup>, pink; Mo<sup>VI</sup>, teal; Sr, dark red; N, blue; O, red; C, gray.



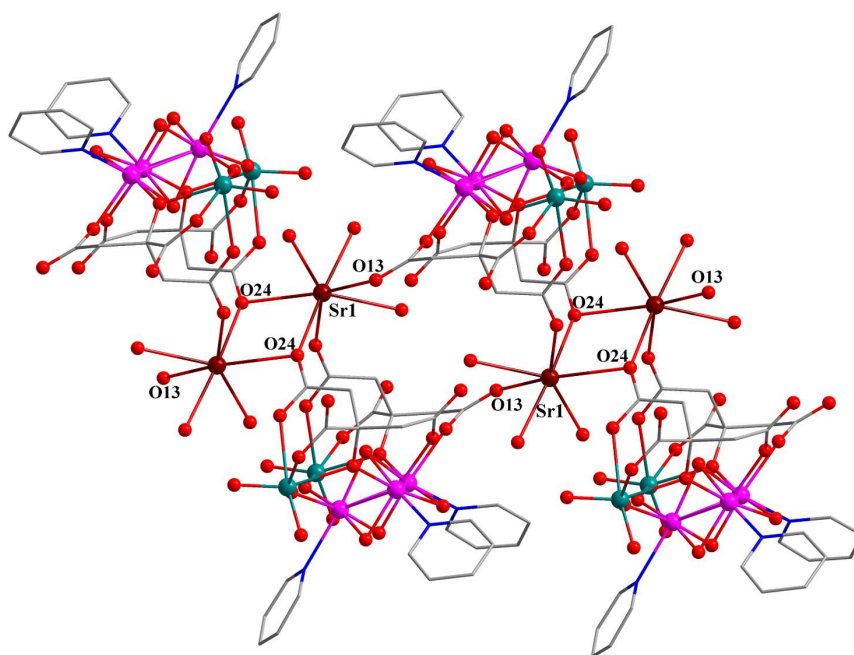

**Figure S5.** Schematic representation of the formation of the one-dimensional structure of **2**. Color code: Mo<sup>IV</sup>, pink; Mo<sup>VI</sup>, teal; Sr, dark red; N, blue; O, red; C, gray.

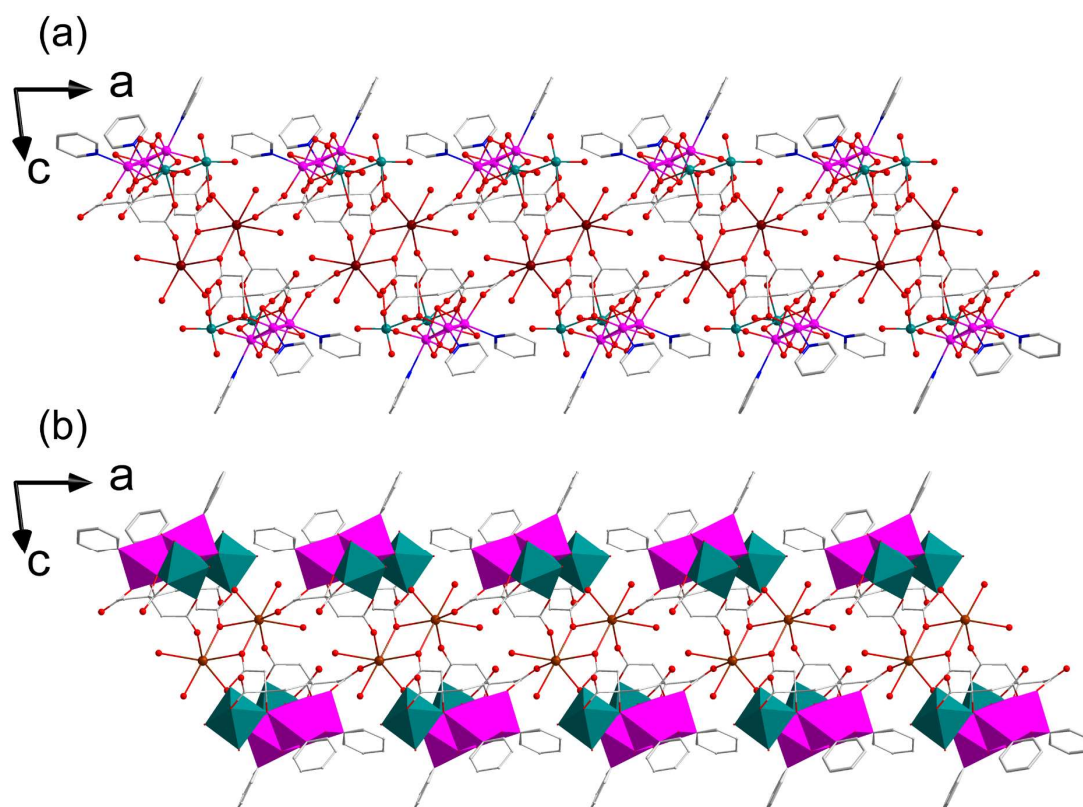

**Figure S6.** The 1D ball-and-stick structure diagrams (a) and polyhedral structure diagrams (b) of **2** in the *ac*-plane. Color code: Mo<sup>IV</sup>, pink; Mo<sup>VI</sup>, teal; Sr, dark red; N, blue; O, red; C, gray.

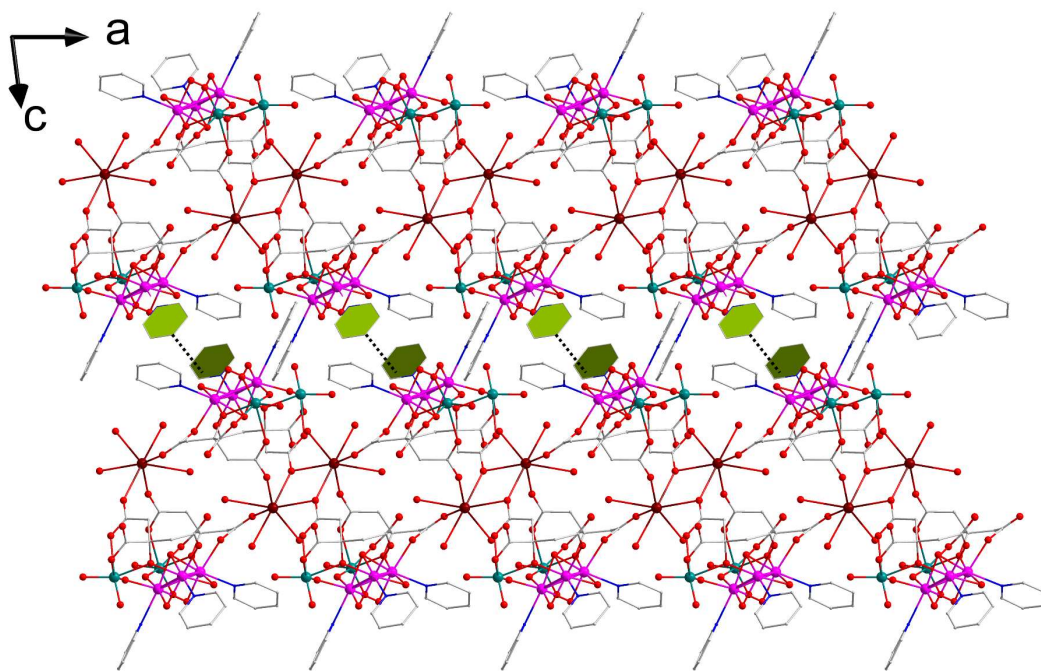

**Figure S7.** The 2D supramolecular structure diagrams of **2** achieved by slipped  $\pi$  stacking interactions between pyridine molecules (six membered rings with green shade) in the ac plane. Color code: Mo<sup>IV</sup>, pink; Mo<sup>VI</sup>, teal; Sr, dark red; N, blue; O, red; C, gray.

## 5. Band valance sum (BVS) calculations and average bond lengths

**Table S2.** BVS values of **1**.

| <b>1</b>  |          |           |                  |                  |
|-----------|----------|-----------|------------------|------------------|
| Sr1 1.985 | O2 2.245 | O10 2.032 | O18 2.331        | <b>O26 0.221</b> |
| Sr2 2.173 | O3 2.176 | O11 2.195 | O19 2.255        | <b>O27 0.219</b> |
| Mo1 4.201 | O4 2.118 | O12 2.345 | O20 2.185        | <b>O28 0.288</b> |
| Mo2 4.208 | O5 2.120 | O13 2.147 | O21 1.785        | <b>O29 0.456</b> |
| Mo3 4.218 | O6 2.019 | O14 1.871 | O22 1.743        |                  |
| Mo4 5.928 | O7 1.741 | O15 1.783 | O23 1.776        |                  |
| Mo5 5.868 | O8 2.080 | O16 1.670 | O24 2.203        |                  |
| O1 2.084  | O9 2.113 | O17 2.178 | <b>O25 0.399</b> |                  |

**Table S3.** BVS values of **2**.

| <b>2</b>  |          |           |           |                  |
|-----------|----------|-----------|-----------|------------------|
| Sr1 2.127 | O2 2.059 | O9 2.210  | O16 1.945 | O23 1.958        |
| Mo1 4.208 | O3 2.132 | O10 1.935 | O17 2.161 | O24 2.221        |
| Mo2 4.158 | O4 2.169 | O11 2.175 | O18 2.215 | <b>O25 0.562</b> |
| Mo3 4.168 | O5 2.175 | O12 2.101 | O19 2.215 | <b>O26 0.352</b> |
| Mo4 5.961 | O6 2.147 | O13 2.099 | O20 1.965 | <b>O27 0.298</b> |
| Mo5 5.905 | O7 2.241 | O14 1.947 | O21 2.188 |                  |
| O1 2.060  | O8 1.860 | O15 1.838 | O22 1.966 |                  |

**Table S4.** Selected average bond lengths (Å) of **1** and **2**.

| Mo <sup>IV</sup> <sub>3</sub> -<br>POMs | d(Mo <sup>IV</sup> -μ <sub>2</sub> O-Mo <sup>IV</sup> ) |                                           |                                       | d(Mo <sup>IV</sup> -μ <sub>2</sub> O-Mo <sup>VI</sup> ) |                                           | d(μ <sub>3</sub> O-<br>Mo <sup>VI</sup> ) |
|-----------------------------------------|---------------------------------------------------------|-------------------------------------------|---------------------------------------|---------------------------------------------------------|-------------------------------------------|-------------------------------------------|
|                                         | d(Mo <sup>IV</sup> -Mo <sup>IV</sup> )                  | d(Mo <sup>IV</sup> -<br>μ <sub>2</sub> O) | d(μ <sub>3</sub> O-Mo <sup>IV</sup> ) | d(Mo <sup>IV</sup> -<br>μ <sub>2</sub> O)               | d(μ <sub>2</sub> O-<br>Mo <sup>VI</sup> ) |                                           |
| <b>1</b>                                | 2.498                                                   | 1.922                                     | 2.043                                 | 2.040                                                   | 1.820                                     | 2.205                                     |
| <b>2</b>                                | 2.508                                                   | 1.924                                     | 2.044                                 | 2.036                                                   | 1.831                                     | 2.206                                     |

## 6. Spectroscopic characterizations

### 6.1 TGA

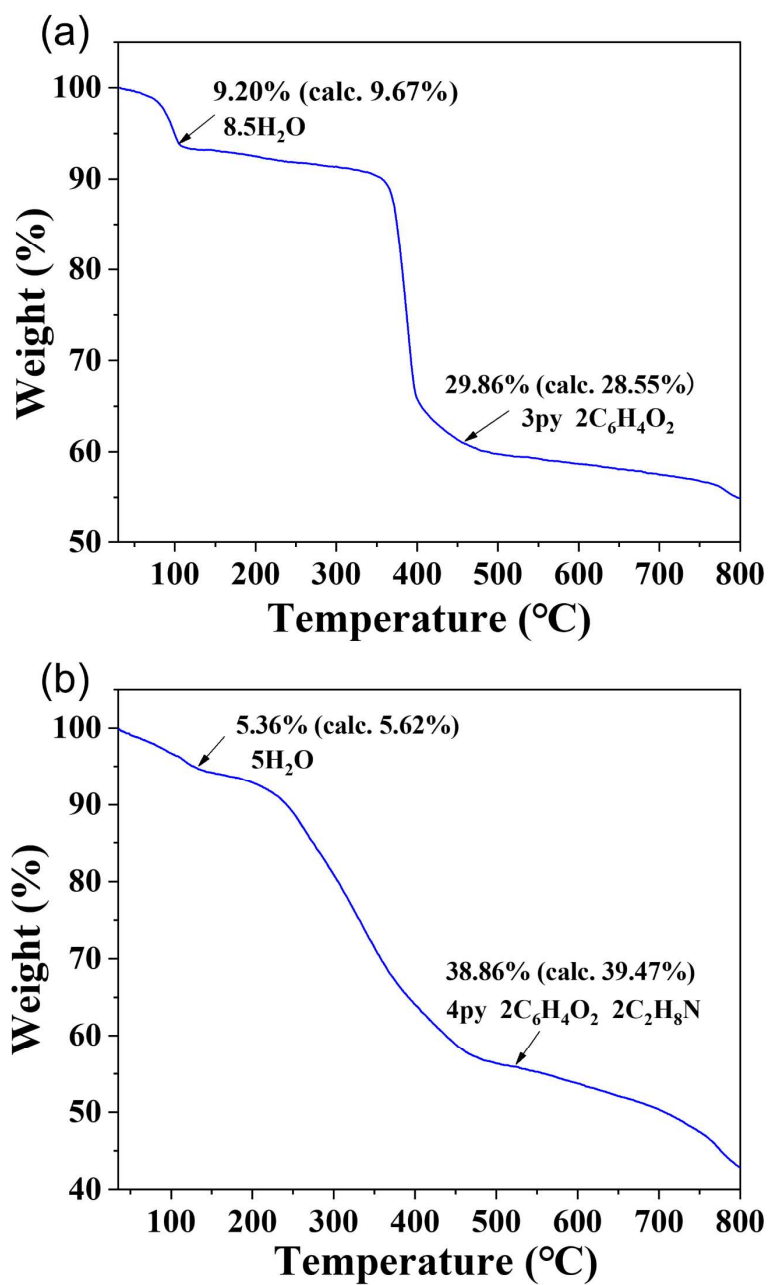

Figure S8. Thermogravimetric analysis curves of 1 (a) and 2 (b).

## 6.2 IR Spectra

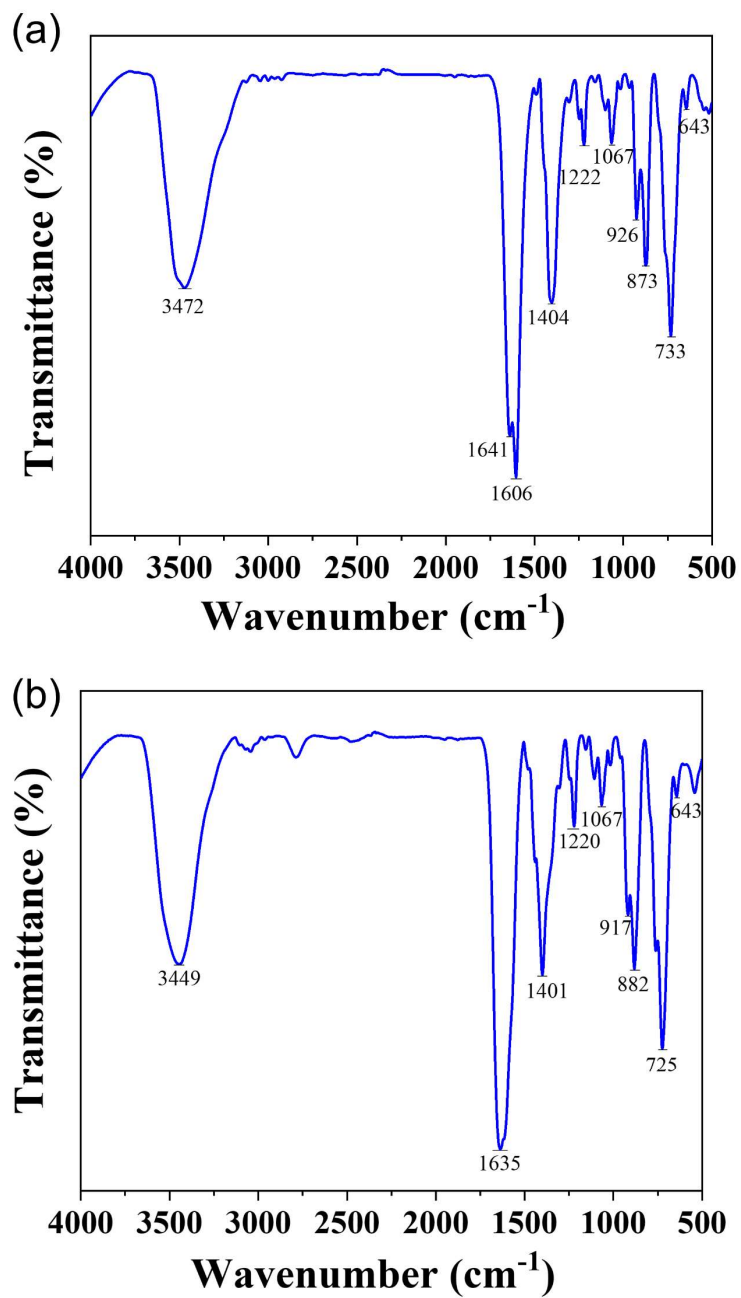

Figure S9. The FT-IR spectra of **1** (a) and **2** (b).

### 6.3 PXRD

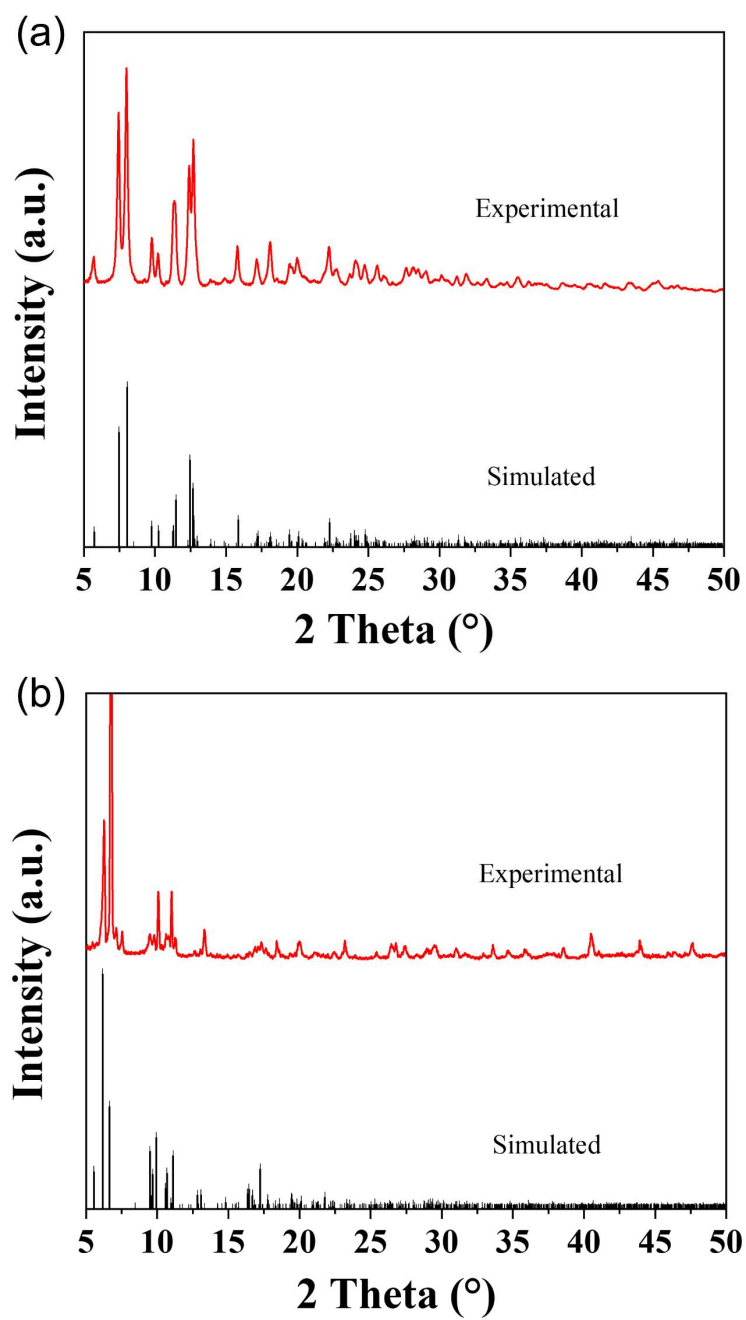

**Figure S10.** The PXRD patterns of as-prepared (red) crystalline samples and the simulated (black), for **1** (a) and **2** (b).

## 6.4 XPS

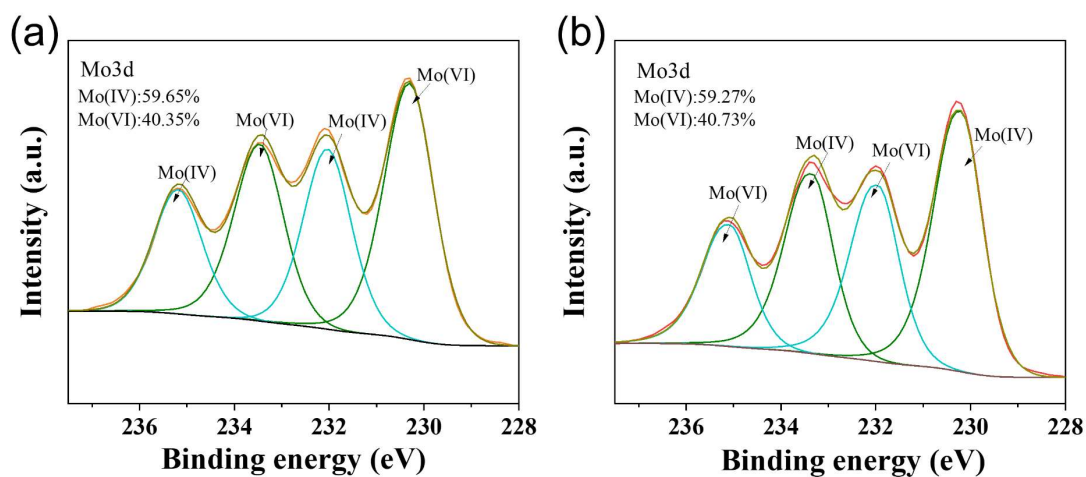

Figure S11. XPS spectra of **1** (a) and **2** (b). ( $\text{Mo}^{\text{IV}}:\text{Mo}^{\text{VI}} = 3:2$ ).

Table S5. Binding energy (eV) value of **1** and **2**.

|                                          | Oxidation state                                 | Mo 3d <sub>5/2</sub> | Mo 3d <sub>3/2</sub> |
|------------------------------------------|-------------------------------------------------|----------------------|----------------------|
| Reported binding energy (eV)             | $\text{Mo}^{\text{IV}}\text{-MoO(OH)}_2$        | 230.2                | 233.4                |
|                                          | $\text{Mo}^{\text{VI}}\text{-Na}_2\text{MoO}_4$ | 231.9-232.3          | 235-235.4            |
| Measured binding energy (eV) of <b>1</b> | $\text{Mo}^{\text{IV}}$                         | 230.30               | 233.46               |
|                                          | $\text{Mo}^{\text{VI}}$                         | 232.03               | 235.18               |
| Measured binding energy (eV) of <b>2</b> | $\text{Mo}^{\text{IV}}$                         | 230.22               | 233.37               |
|                                          | $\text{Mo}^{\text{VI}}$                         | 231.95               | 235.08               |

## 6.5 UV-vis

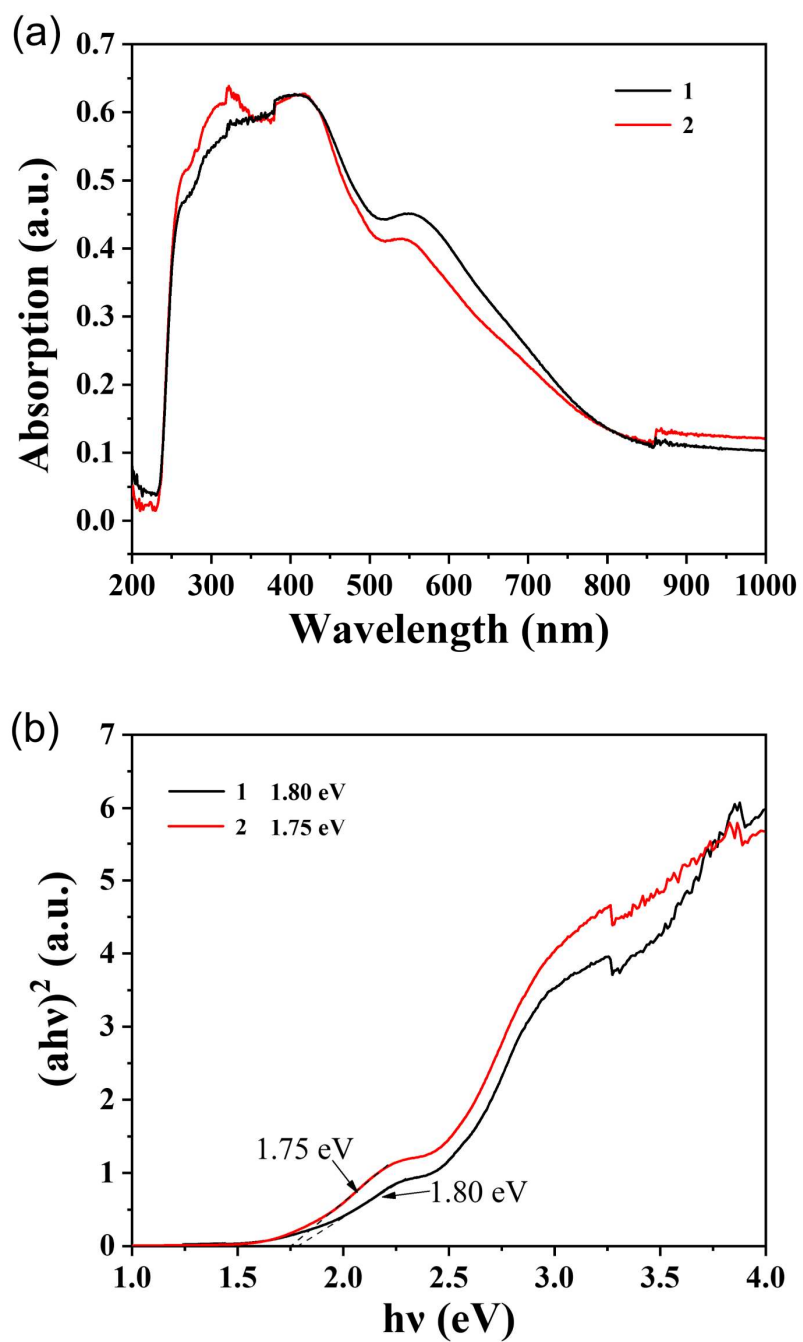

**Figure S12.** (a) solid-state UV-vis spectra of **1** and **2**. (b) their transformation based on Tauc plot function. The inset indicates the calculated optical bandgaps of **1** and **2**.



## 7. Frontier and metal-metal bonding orbitals

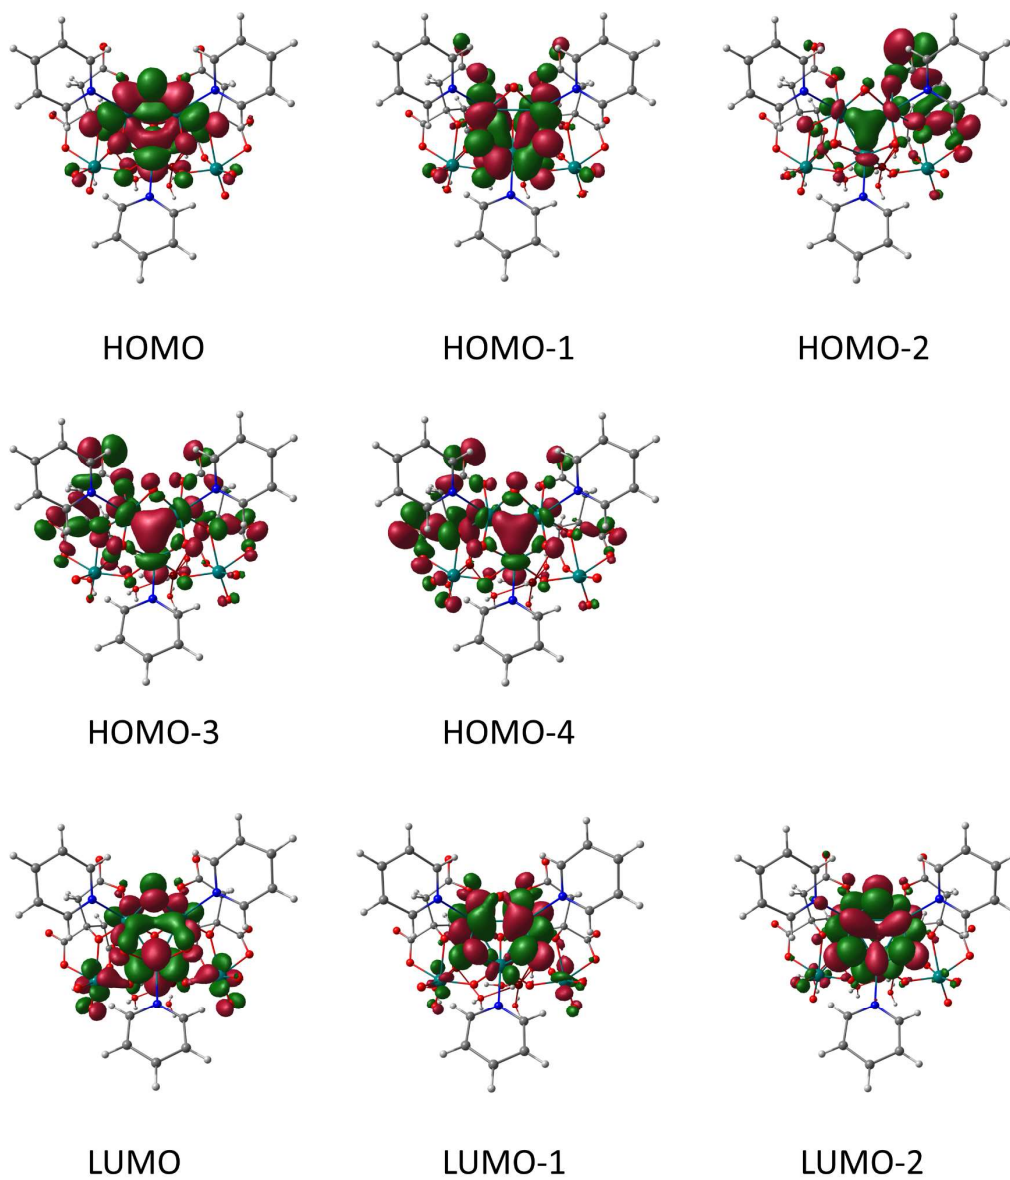

**Figure S13.** Representative molecular orbitals of **1**.

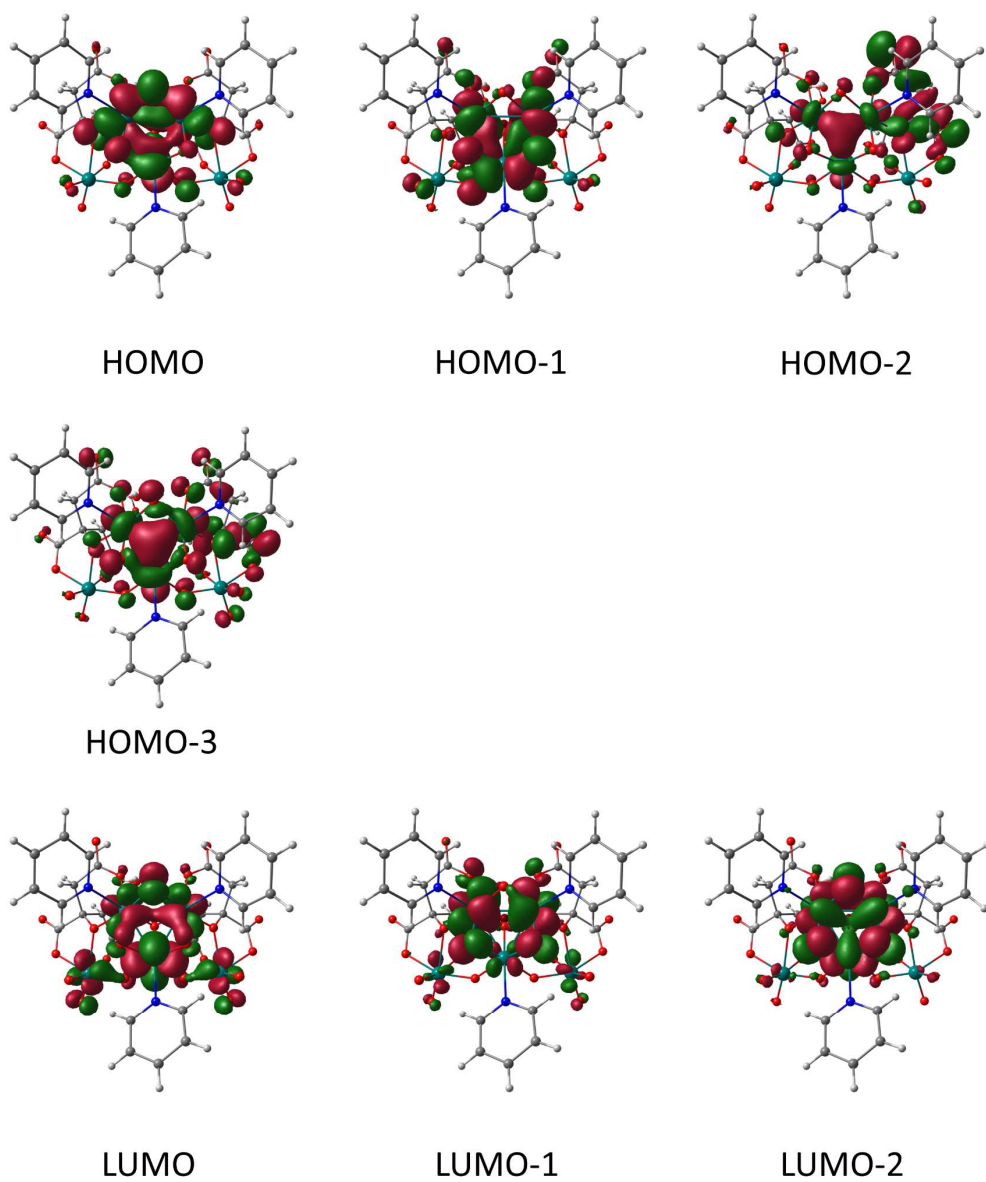

**Figure S14.** Representative molecular orbitals of **2**.

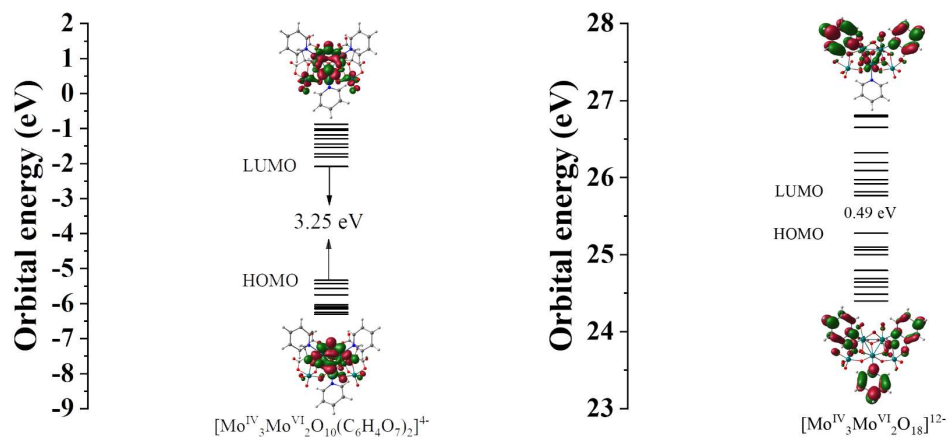

**Figure S15.** The MO energy levels and HOMO-LUMO gap of  $[\text{Mo}^{\text{IV}}_3\text{Mo}^{\text{VI}}_2\text{O}_{10}(\text{C}_6\text{H}_4\text{O}_7)_2\text{py}_3]^{4+}$  and  $[\text{Mo}^{\text{IV}}_3\text{Mo}^{\text{VI}}_2\text{O}_{18}\text{py}_3]^{12-}$ .

## 8. Electrochemical characterizations

**Table S6.** Electric conductivity of **1** and **2** at 25 °C.

| Sample   | Electric conductivity<br>(S cm <sup>-1</sup> ) | Electric conductivity (S cm <sup>-1</sup> ) |                        |
|----------|------------------------------------------------|---------------------------------------------|------------------------|
|          |                                                | Sample 1                                    | Sample 2               |
| <b>1</b> | 4.73×10 <sup>-10</sup>                         | 3.48×10 <sup>-10</sup>                      | 5.99×10 <sup>-10</sup> |
| <b>2</b> | 1.78×10 <sup>-9</sup>                          | 1.73×10 <sup>-9</sup>                       | 1.83×10 <sup>-9</sup>  |

**Table S7.** Comparison of electrochemical performance of reported cathode materials.

| Cathode                                                                          | Specific capacity<br>[mA h g <sup>-1</sup> ] | Rate<br>[C or mA g <sup>-1</sup> ] | Cycle numbers | Refs.            |
|----------------------------------------------------------------------------------|----------------------------------------------|------------------------------------|---------------|------------------|
| SiW <sub>12</sub>                                                                | 150                                          | 50 mA g <sup>-1</sup>              | 20            | [11]             |
| SiW <sub>12</sub> /rGO                                                           | 275                                          | 50 mA g <sup>-1</sup>              | 20            | [11]             |
| Mn <sub>3</sub> V <sub>19</sub>                                                  | 190.1                                        | 100 mA g <sup>-1</sup>             | 100           | [12]             |
| γ -LiV <sub>2</sub> O <sub>5</sub>                                               | 220                                          | 50 mA g <sup>-1</sup>              | 20            | [13]             |
| Li <sub>7</sub> [V <sub>15</sub> O <sub>36</sub> (CO <sub>3</sub> )]             | 140                                          | 2 A g <sup>-1</sup>                | 100           | [14]             |
| K <sub>7</sub> NiV <sub>13</sub> O <sub>38</sub>                                 | 200                                          | 17 mA g <sup>-1</sup>              | 24            | [15]             |
| K <sub>3</sub> [PMo <sub>12</sub> O <sub>40</sub> ]                              | 200                                          | 50 μA                              | 10            | [15]             |
| TBA <sub>3</sub> [PMo <sub>12</sub> O <sub>40</sub> ]                            | 260                                          | 1 mA                               | 10            | [16]             |
| TBA <sub>3</sub> [PMo <sub>12</sub> O <sub>40</sub> ]/S-rGO                      | 320                                          | 1 mA                               | 100           | [17]             |
| Na <sub>2</sub> H <sub>8</sub> [MnV <sub>13</sub> O <sub>38</sub> ]/G            | 190                                          | 0.1 C                              | 100           | [18]             |
| Na <sub>2</sub> H <sub>8</sub> [MnV <sub>13</sub> O <sub>38</sub> ]              | 100                                          | 0.1 C                              | 100           | [18]             |
| K <sub>5.72</sub> H <sub>3.28</sub> [PV <sub>14</sub> O <sub>42</sub> ]<br>(KPV) | 140                                          | 100μA                              | 50            | [19]             |
| <b>1</b>                                                                         | <b>97.7</b>                                  | <b>2 A g<sup>-1</sup></b>          | <b>100</b>    | <b>This work</b> |
| <b>2</b>                                                                         | <b>121.8</b>                                 | <b>2 A g<sup>-1</sup></b>          | <b>100</b>    | <b>This work</b> |

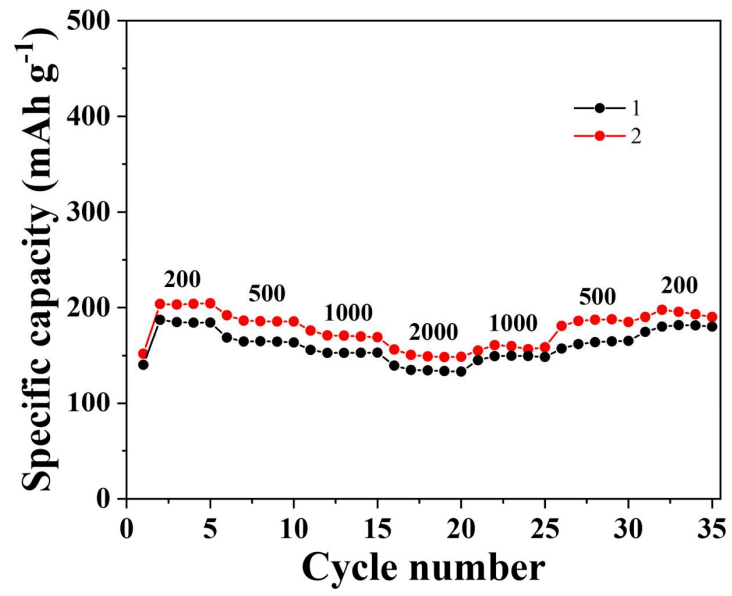

Figure S16. Rate performance of 1 and 2.

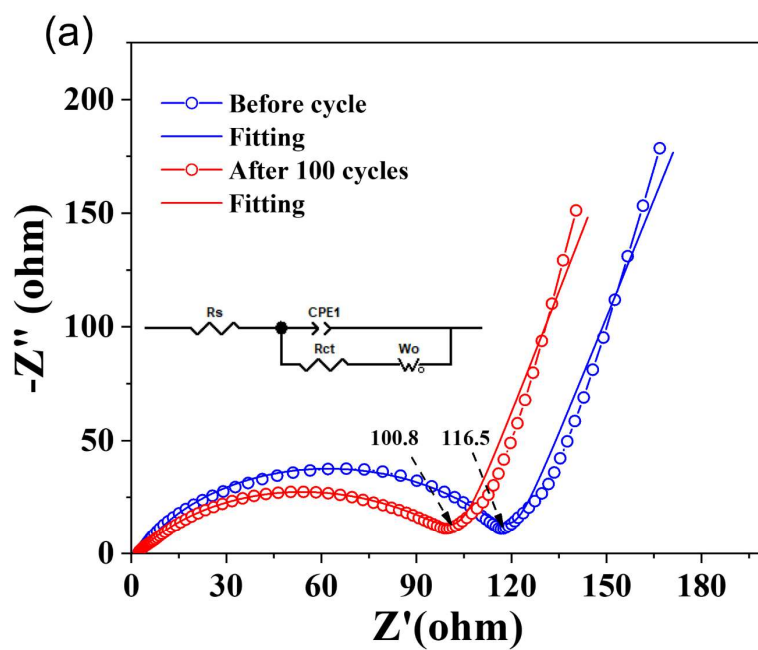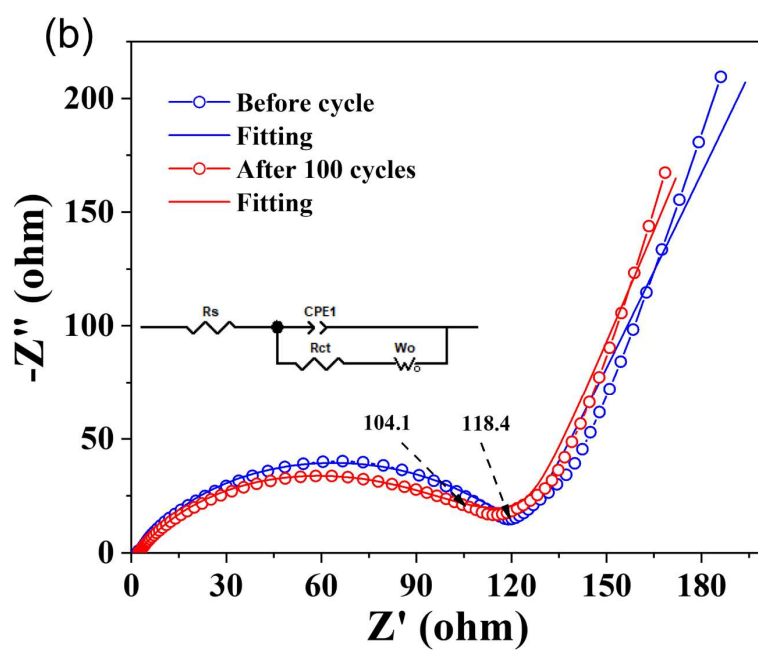

**Figure S17.** The Nyquist plots before cycles and after 100 charging/discharging cycles of **1** (a) and **2** (b).

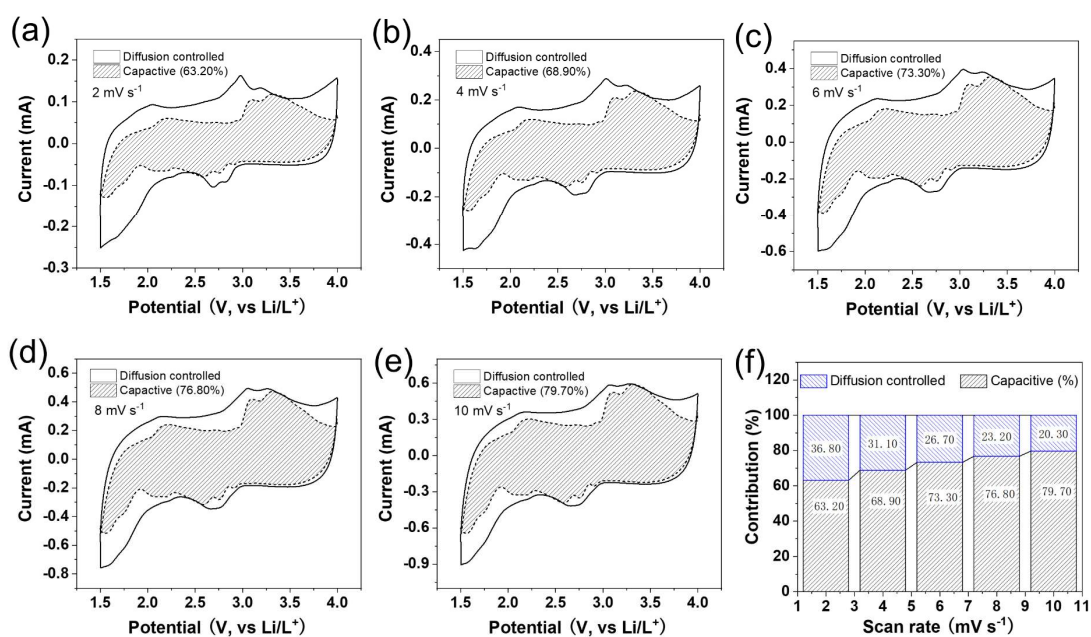

Figure S18. Capacity contribution analysis of **1** at different scan rates (2-10 mV s<sup>-1</sup>).

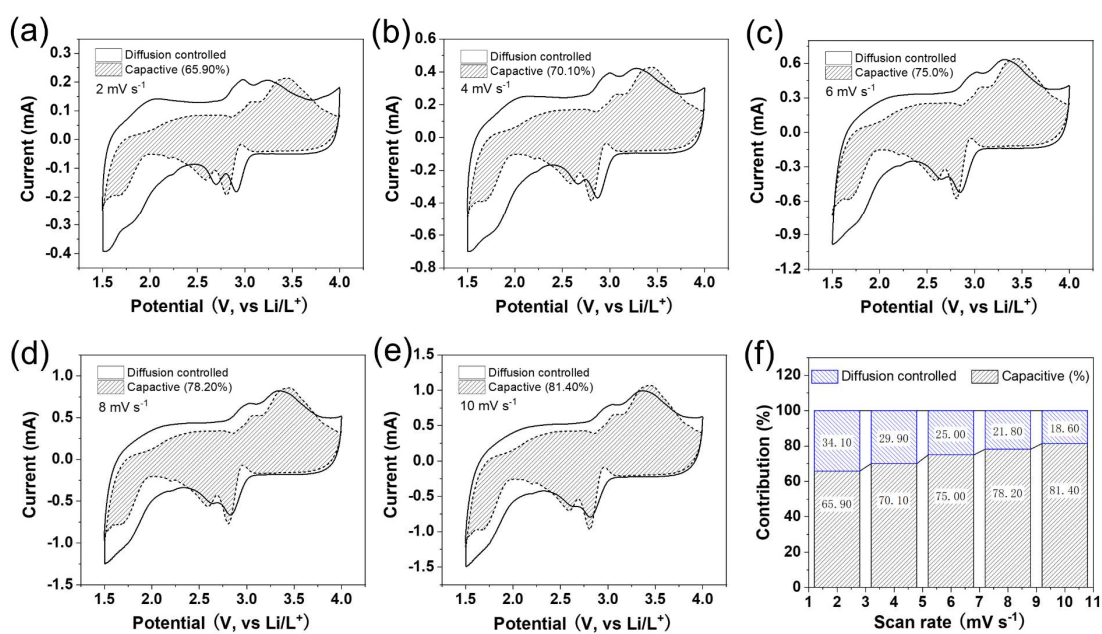

Figure S19. Capacity contribution analysis of **2** at different scan rates (2-10 mV s<sup>-1</sup>).

## 9. The xyz coordinates of computationally studied models.

**Table S8** Cartesian coordinates (in Angstroms) of the hybrid POM1.

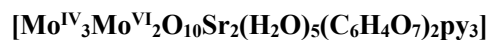

Level: B3LYP/Lanl2DZ

99

|    |          |          |          |
|----|----------|----------|----------|
| Mo | 8.79616  | 8.93436  | 12.71551 |
| Mo | 8.15718  | 2.52958  | 12.76650 |
| Mo | 9.87574  | 6.83982  | 9.75877  |
| Mo | 9.73466  | 5.60765  | 11.93119 |
| Mo | 9.52901  | 4.36620  | 9.77777  |
| Sr | 2.78190  | 9.67636  | 12.39455 |
| Sr | 3.10719  | 5.38395  | 13.52261 |
| O  | 8.27942  | 5.79601  | 10.50193 |
| O  | 8.75458  | 7.32234  | 8.03541  |
| O  | 8.19930  | 8.53728  | 6.30379  |
| O  | 8.94799  | 8.61127  | 10.53716 |
| O  | 7.61225  | 11.84341 | 9.98872  |
| O  | 8.54656  | 4.29240  | 12.98135 |
| O  | 10.46144 | 9.35192  | 12.86912 |
| O  | 8.11916  | 9.47608  | 14.19967 |
| O  | 8.83265  | 7.12511  | 12.91248 |
| O  | 6.59576  | 8.69371  | 12.11204 |
| O  | 7.06756  | 3.44530  | 6.45401  |
| O  | 8.24678  | 4.28855  | 8.08434  |
| O  | 5.47758  | 0.64849  | 10.35904 |
| O  | 7.20907  | 0.91321  | 11.74732 |
| O  | 9.69057  | 1.79147  | 12.74416 |
| O  | 7.48888  | 2.04423  | 14.29959 |
| O  | 4.68663  | 8.93200  | 11.00480 |
| O  | 8.16117  | 2.95951  | 10.60534 |
| O  | 5.92635  | 3.20125  | 12.48812 |
| O  | 3.46533  | 7.87824  | 14.37827 |
| O  | 4.12435  | 4.16640  | 11.59150 |
| O  | 5.66370  | 6.16741  | 13.29496 |
| O  | 10.70729 | 4.05030  | 11.23388 |
| O  | 8.35149  | 10.77370 | 11.78355 |
| O  | 11.05944 | 6.85618  | 11.23252 |
| O  | 10.73100 | 5.44701  | 8.75027  |
| O  | 0.73166  | 4.59930  | 12.59821 |
| O  | 1.23973  | 5.84641  | 15.22384 |
| O  | 4.99903  | 10.51011 | 13.54399 |
| N  | 11.40594 | 8.13936  | 8.83393  |
| N  | 11.18844 | 5.50073  | 13.62822 |



|   |          |          |          |
|---|----------|----------|----------|
| N | 10.55822 | 2.64335  | 8.82238  |
| C | 11.83644 | 6.63683  | 14.01435 |
| C | 12.80937 | 6.62630  | 15.00227 |
| C | 13.12083 | 5.44076  | 15.62575 |
| C | 12.43958 | 4.27781  | 15.25095 |
| C | 11.50631 | 4.36480  | 14.24346 |
| C | 12.01032 | 9.10053  | 9.54880  |
| C | 13.10020 | 9.94976  | 7.63171  |
| C | 12.86467 | 10.02226 | 8.97447  |
| C | 12.49778 | 8.98336  | 6.88885  |
| C | 6.65523  | 8.89084  | 9.70138  |
| C | 5.92546  | 8.84294  | 11.02114 |
| C | 7.50400  | 3.34388  | 7.61128  |
| C | 7.19732  | 2.16099  | 8.47850  |
| C | 6.96608  | 2.51286  | 9.95787  |
| C | 6.50692  | 1.24795  | 10.70081 |
| C | 5.85953  | 3.56972  | 10.10671 |
| C | 5.25052  | 3.66185  | 11.48308 |
| C | 8.01903  | 10.82086 | 10.54137 |
| C | 10.91029 | 2.70019  | 7.52150  |
| C | 11.65631 | 8.06122  | 7.50540  |
| C | 11.45143 | 0.43514  | 8.93780  |
| C | 11.81001 | 0.48435  | 7.59900  |
| C | 11.52074 | 1.63493  | 6.88738  |
| C | 8.59727  | 9.70917  | 8.35694  |
| C | 8.49912  | 8.47304  | 7.50433  |
| C | 10.83378 | 1.52672  | 9.51177  |
| C | 8.08372  | 9.47146  | 9.79045  |
| H | 6.23497  | 4.45432  | 9.86873  |
| H | 8.00882  | 1.76535  | 8.41638  |
| H | 6.42846  | 1.75569  | 8.21798  |
| H | 11.61482 | 7.45953  | 13.59420 |
| H | 13.25567 | 7.42886  | 15.24564 |
| H | 6.04357  | 7.00523  | 13.19407 |
| H | 6.23595  | 5.43541  | 13.32702 |
| H | 13.78860 | 5.41197  | 16.30085 |
| H | 12.61669 | 3.44938  | 15.68089 |
| H | 11.06415 | 3.56898  | 13.97201 |
| H | 11.84499 | 9.14913  | 10.48305 |
| H | 13.68424 | 10.57369 | 7.21691  |
| H | 13.27995 | 10.69317 | 9.50356  |
| H | 12.65049 | 8.93750  | 5.95233  |
| H | 6.12858  | 9.43856  | 9.06675  |
| H | 6.70756  | 7.97314  | 9.33370  |

|   |          |          |          |
|---|----------|----------|----------|
| H | 5.14053  | 3.36636  | 9.45727  |
| H | 10.73403 | 3.49294  | 7.02856  |
| H | 11.25459 | 7.37170  | 6.98994  |
| H | 11.62932 | -0.34221 | 9.45411  |
| H | 12.24234 | -0.25172 | 7.18210  |
| H | 11.74123 | 1.69253  | 5.96512  |
| H | 8.06938  | 10.43490 | 7.93891  |
| H | 9.54175  | 10.00350 | 8.39484  |
| H | 10.59456 | 1.48591  | 10.43026 |
| H | 0.01807  | 4.71467  | 13.21487 |
| H | 0.44451  | 4.66568  | 11.69426 |
| H | 0.39800  | 5.74025  | 14.79698 |
| H | 1.24432  | 5.48904  | 16.10711 |
| H | 5.01630  | 10.24293 | 14.45185 |
| H | 5.25280  | 11.41734 | 13.42208 |
| H | 2.96026  | 7.95852  | 15.17814 |
| H | 4.37398  | 8.14142  | 14.49985 |

**Table S9** Cartesian coordinates (in Angstroms) of the hybrid POM2.

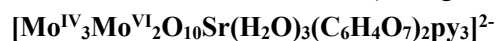

Level: B3LYP/LanL2DZ

86

|    |         |          |          |
|----|---------|----------|----------|
| Mo | 5.62991 | 11.28919 | 2.27870  |
| Mo | 6.10468 | 14.61888 | 3.42582  |
| Mo | 7.60260 | 8.39362  | 2.92784  |
| Mo | 3.40259 | 11.96747 | 3.20853  |
| Mo | 3.99740 | 9.53170  | 2.98374  |
| Sr | 6.47243 | 10.96206 | 9.17888  |
| O  | 7.30998 | 9.76998  | 7.15119  |
| O  | 2.24923 | 7.39622  | 6.22308  |
| O  | 4.22649 | 12.47130 | 1.57799  |
| O  | 7.45450 | 6.51448  | 3.89624  |
| O  | 4.90059 | 9.74430  | 1.34404  |
| O  | 7.87782 | 8.89720  | 5.20388  |
| O  | 4.88512 | 10.95335 | 4.16146  |
| O  | 2.25628 | 11.92210 | 4.98068  |
| O  | 2.39232 | 10.48228 | 2.50847  |
| O  | 7.28981 | 10.19315 | 2.76709  |
| O  | 9.32607 | 8.26634  | 2.93513  |
| O  | 5.54265 | 8.21368  | 3.68186  |
| O  | 3.86544 | 11.39853 | 8.73107  |
| O  | 6.58356 | 13.90719 | 5.54463  |
| O  | 2.96500 | 8.77295  | 4.66677  |
| O  | 5.44406 | 11.79621 | 11.28938 |
| O  | 7.73522 | 9.61154  | 10.95931 |

|   |          |          |          |
|---|----------|----------|----------|
| O | 6.44830  | 12.87568 | 7.49566  |
| O | 7.60732  | 15.45392 | 3.58328  |
| O | 7.16617  | 7.77002  | 1.40827  |
| O | 6.61010  | 12.92902 | 2.94454  |
| O | 0.61485  | 12.67829 | 6.26846  |
| O | 4.17111  | 13.78071 | 4.09228  |
| O | 3.76945  | 16.54935 | 6.25354  |
| O | 6.67794  | 5.53373  | 5.72066  |
| O | 5.15227  | 16.10176 | 4.59917  |
| O | 5.45354  | 15.23982 | 1.96999  |
| N | 1.68051  | 13.18828 | 2.44840  |
| N | 6.66300  | 11.63726 | 0.32007  |
| N | 3.05900  | 7.81605  | 1.89258  |
| C | 7.04508  | 9.05747  | 6.14282  |
| C | 2.23451  | 14.27240 | 5.50501  |
| C | 6.61781  | 6.41118  | 4.86031  |
| C | 1.63731  | 12.87214 | 5.59932  |
| C | 1.76465  | 7.49908  | 2.08420  |
| C | 7.73523  | 13.09672 | -1.22675 |
| C | 7.51549  | 10.80069 | -1.75139 |
| C | 1.88553  | 14.33606 | 1.77914  |
| C | 5.48486  | 7.45995  | 4.89385  |
| C | 3.73236  | 7.15247  | 0.92784  |
| C | 4.22794  | 15.76673 | 5.43244  |
| C | 0.41666  | 12.74190 | 2.61759  |
| C | 0.83215  | 15.04618 | 1.21777  |
| C | 7.95268  | 12.04724 | -2.11255 |
| C | 4.14990  | 6.70959  | 4.99431  |
| C | -0.44898 | 14.58293 | 1.36681  |
| C | -0.67634 | 13.40742 | 2.09528  |
| C | 3.03687  | 7.66609  | 5.32279  |
| C | 3.75955  | 14.30210 | 5.35785  |
| C | 5.91298  | 13.41505 | 6.52481  |
| C | 5.69950  | 8.37955  | 6.09990  |
| C | 6.89432  | 10.62137 | -0.52333 |
| C | 1.80162  | 5.85407  | 0.35656  |
| C | 7.06638  | 12.86644 | -0.04849 |
| C | 4.40838  | 13.53237 | 6.51427  |
| C | 1.11561  | 6.52846  | 1.33478  |
| C | 3.13714  | 6.16434  | 0.14652  |
| H | 1.98493  | 14.77856 | 6.31841  |
| H | 1.83234  | 14.73655 | 4.72853  |
| H | 1.27703  | 7.95758  | 2.75838  |
| H | 8.04772  | 13.96931 | -1.43514 |

|   |          |          |          |
|---|----------|----------|----------|
| H | 7.63667  | 10.06323 | -2.33788 |
| H | 2.77067  | 14.66883 | 1.68815  |
| H | 4.64528  | 7.36740  | 0.77653  |
| H | 0.27437  | 11.94350 | 3.11236  |
| H | 0.99843  | 15.84682 | 0.73422  |
| H | 8.39116  | 12.19057 | -2.94302 |
| H | 3.95706  | 6.25858  | 4.13437  |
| H | 4.21078  | 6.01659  | 5.69868  |
| H | -1.17694 | 15.05472 | 0.97954  |
| H | -1.55737 | 13.07716 | 2.22646  |
| H | 4.99539  | 9.07547  | 6.09553  |
| H | 5.58787  | 7.84686  | 6.92688  |
| H | 6.62309  | 9.74652  | -0.27117 |
| H | 1.37070  | 5.18817  | -0.16631 |
| H | 6.88255  | 13.60074 | 0.52555  |
| H | 4.13169  | 13.96557 | 7.36038  |
| H | 4.03240  | 12.61656 | 6.51819  |
| H | 0.20068  | 6.33179  | 1.49821  |
| H | 3.63854  | 5.70982  | -0.52021 |

**Table S10** Cartesian coordinates (in Angstroms) of the  $[\text{Mo}_3\text{O}_4(\text{C}_2\text{O}_4)_3(\text{Mepy})_3]^{2-}$ .

$[\text{Mo}_3\text{O}_4(\text{C}_2\text{O}_4)_3(\text{Mepy})_3]^{2-}$

Level: B3LYP/LanL2DZ

67

|    |         |          |         |
|----|---------|----------|---------|
| Mo | 3.07379 | 0.33549  | 4.28070 |
| Mo | 4.59712 | -1.58878 | 3.83855 |
| Mo | 3.15235 | -1.57466 | 5.88551 |
| N  | 1.50931 | 1.21460  | 2.95331 |
| N  | 1.58668 | -2.94793 | 6.65599 |
| N  | 4.79270 | -2.97746 | 2.11445 |
| O  | 1.65539 | -0.68848 | 5.07031 |
| O  | 3.34113 | -0.72433 | 2.70259 |
| O  | 4.65271 | -0.28678 | 5.41094 |
| O  | 4.29047 | 1.91679  | 3.63221 |
| O  | 2.75107 | 1.86934  | 5.68600 |
| O  | 3.46421 | -2.95215 | 4.57379 |
| O  | 3.00909 | -0.60203 | 7.71908 |
| O  | 4.51851 | -2.58840 | 7.14440 |
| O  | 6.39085 | -2.41971 | 4.55521 |
| O  | 6.12508 | -0.48289 | 2.89885 |
| O  | 5.23963 | 3.82831  | 4.25196 |
| O  | 3.67273 | 3.72393  | 6.55198 |
| O  | 5.67379 | -2.42182 | 9.04891 |
| O  | 3.89114 | -0.37007 | 9.76113 |
| O  | 8.29629 | -0.05904 | 2.81684 |

|   |          |          |          |
|---|----------|----------|----------|
| O | 8.58647  | -2.06440 | 4.77347  |
| C | 3.57713  | 2.86886  | 5.69348  |
| C | 4.47269  | 2.90682  | 4.42707  |
| C | 3.83971  | -0.89513 | 8.65767  |
| C | 4.79108  | -2.05280 | 8.29249  |
| C | 7.50307  | -1.81557 | 4.29680  |
| C | 7.33671  | -0.66423 | 3.25677  |
| C | 0.21483  | 1.23463  | 3.25976  |
| C | 1.85812  | 1.50454  | 1.69139  |
| C | 1.77318  | -4.27429 | 6.66880  |
| C | 0.36215  | -2.48824 | 6.96244  |
| C | 4.70989  | -2.52725 | 0.86278  |
| C | 4.77103  | -4.30487 | 2.30430  |
| C | 0.94233  | 1.77551  | 0.72183  |
| C | -0.40512 | 1.75337  | 1.01227  |
| C | -0.75854 | 1.50560  | 2.33420  |
| C | -1.45138 | 1.96740  | -0.05553 |
| C | -0.68916 | -3.31695 | 7.26228  |
| C | -0.50834 | -4.68970 | 7.27168  |
| C | 0.75728  | -5.15994 | 6.97056  |
| C | -1.66549 | -5.61752 | 7.53649  |
| C | 4.52120  | -3.36756 | -0.20075 |
| C | 4.42129  | -4.74348 | 0.01068  |
| C | 4.58898  | -5.20528 | 1.29203  |
| C | 4.08765  | -5.70082 | -1.11905 |
| H | 2.76055  | 1.52036  | 1.46928  |
| H | 1.22662  | 1.97689  | -0.14095 |
| H | -1.65122 | 1.52458  | 2.58833  |
| H | -0.03995 | 1.05750  | 4.13663  |
| H | -2.24443 | 1.47502  | 0.17085  |
| H | -1.11321 | 1.66269  | -0.89908 |
| H | -1.66078 | 2.90260  | -0.11319 |
| H | 0.22060  | -1.56886 | 6.97056  |
| H | -1.52380 | -2.95742 | 7.45961  |
| H | 0.92335  | -6.07511 | 6.97270  |
| H | 2.61721  | -4.60957 | 6.46656  |
| H | -1.77995 | -5.72085 | 8.48469  |
| H | -1.48818 | -6.47365 | 7.14141  |
| H | -2.46450 | -5.24850 | 7.15636  |
| H | 4.78115  | -1.61314 | 0.70688  |
| H | 4.46090  | -3.02279 | -1.06352 |
| H | 4.57903  | -6.11728 | 1.46928  |
| H | 4.88482  | -4.62961 | 3.16921  |
| H | 4.45229  | -6.56748 | -0.92257 |

H 4.46581 -5.37292 -1.93698  
H 3.13573 -5.76724 -1.21088

**Table S11** Cartesian coordinates (in Angstroms) of the  $[\text{Mo}^{\text{IV}}_3\text{Mo}^{\text{VI}}_2\text{O}_{10}(\text{C}_6\text{H}_4\text{O}_7)_2\text{py}_3]^{4+}$ .  
 $[\text{Mo}^{\text{IV}}_3\text{Mo}^{\text{VI}}_2\text{O}_{10}(\text{C}_6\text{H}_4\text{O}_7)_2\text{py}_3]^{4+}$

Level: B3LYP/Lanl2DZ

82

|    |         |          |         |
|----|---------|----------|---------|
| Mo | 5.62960 | 11.28918 | 2.27878 |
| Mo | 3.99732 | 9.53173  | 2.98346 |
| Mo | 3.40248 | 11.96765 | 3.20837 |
| Mo | 6.10458 | 14.61879 | 3.42581 |
| Mo | 7.60255 | 8.39311  | 2.92806 |
| N  | 6.65903 | 11.64054 | 0.32313 |
| N  | 1.68092 | 13.18306 | 2.44496 |
| N  | 3.06046 | 7.81391  | 1.89102 |
| O  | 4.90058 | 9.74540  | 1.34457 |
| O  | 4.22810 | 12.47014 | 1.58063 |
| O  | 6.61100 | 12.92776 | 2.94318 |
| O  | 7.28862 | 10.19167 | 2.76904 |
| O  | 4.88277 | 10.95141 | 4.15930 |
| O  | 2.39514 | 10.48091 | 2.50943 |
| O  | 2.25671 | 11.92318 | 4.97906 |
| O  | 4.17150 | 13.77828 | 4.09212 |
| O  | 2.96506 | 8.77416  | 4.66516 |
| O  | 5.54203 | 8.21229  | 3.68368 |
| O  | 5.45339 | 15.23935 | 1.96743 |
| O  | 7.60551 | 15.45214 | 3.58148 |
| O  | 5.15156 | 16.10111 | 4.60181 |
| O  | 6.58353 | 13.90635 | 5.54255 |
| O  | 7.16738 | 7.77014  | 1.40872 |
| O  | 9.32598 | 8.26720  | 2.93682 |
| O  | 7.45270 | 6.51358  | 3.89188 |
| O  | 7.87893 | 8.89769  | 5.20302 |
| O  | 7.31059 | 9.76840  | 7.15023 |
| O  | 6.44906 | 12.87745 | 7.49565 |
| O  | 0.61452 | 12.68164 | 6.26680 |
| O  | 3.76660 | 16.54891 | 6.25248 |
| O  | 2.24738 | 7.39832  | 6.22064 |
| O  | 6.67852 | 5.53393  | 5.72242 |
| C  | 3.76188 | 14.30156 | 5.35472 |
| C  | 1.63766 | 12.87510 | 5.59667 |
| C  | 4.22742 | 15.76948 | 5.43431 |
| C  | 5.91352 | 13.41998 | 6.52626 |
| C  | 5.48283 | 7.46254  | 4.89469 |
| C  | 3.03497 | 7.66208  | 5.31970 |

|   |          |          |          |
|---|----------|----------|----------|
| C | 6.61600  | 6.40603  | 4.85968  |
| C | 7.04384  | 9.06025  | 6.14742  |
| C | 6.89403  | 10.62242 | -0.52528 |
| C | 7.07084  | 12.86810 | -0.04457 |
| C | 1.88484  | 14.33605 | 1.78119  |
| C | 0.41931  | 12.73875 | 2.61687  |
| C | 3.72872  | 7.15119  | 0.92641  |
| C | 1.76445  | 7.49570  | 2.08363  |
| C | 7.73632  | 13.09443 | -1.22885 |
| C | 7.95266  | 12.04897 | -2.11228 |
| C | 7.51961  | 10.79872 | -1.74776 |
| C | 0.83949  | 15.05572 | 1.22248  |
| C | -0.45540 | 14.57335 | 1.36733  |
| C | -0.67585 | 13.40845 | 2.09159  |
| C | 1.11484  | 6.52554  | 1.33550  |
| C | 1.80243  | 5.85238  | 0.35178  |
| C | 3.14338  | 6.16536  | 0.14963  |
| C | 2.23202  | 14.26737 | 5.50434  |
| C | 4.40855  | 13.53101 | 6.51193  |
| C | 4.15015  | 6.71293  | 4.99498  |
| C | 5.69940  | 8.38135  | 6.10126  |
| H | 6.89666  | 13.60224 | 0.53156  |
| H | 8.04684  | 13.96717 | -1.44033 |
| H | 8.38855  | 12.19337 | -2.94415 |
| H | 7.64828  | 10.05964 | -2.33116 |
| H | 6.61876  | 9.74753  | -0.27577 |
| H | 2.77145  | 14.66720 | 1.69229  |
| H | 1.00484  | 15.86252 | 0.75012  |
| H | -1.18492 | 15.03783 | 0.97493  |
| H | -1.55656 | 13.07772 | 2.22389  |
| H | 0.27588  | 11.94107 | 3.11231  |
| H | 1.27798  | 7.95411  | 2.75868  |
| H | 0.20049  | 6.32671  | 1.50185  |
| H | 1.37194  | 5.19091  | -0.17608 |
| H | 3.64940  | 5.70946  | -0.51145 |
| H | 4.64114  | 7.36896  | 0.77358  |
| H | 1.98335  | 14.77083 | 6.31979  |
| H | 1.82855  | 14.73274 | 4.73031  |
| H | 4.12734  | 13.96133 | 7.35871  |
| H | 4.03563  | 12.61384 | 6.51289  |
| H | 3.95888  | 6.26031  | 4.13552  |
| H | 4.21151  | 6.02118  | 5.70007  |
| H | 4.99555  | 9.07771  | 6.09691  |
| H | 5.58749  | 7.84857  | 6.92734  |

**Table S12** Cartesian coordinates (in Angstroms) of the  $[\text{Mo}^{\text{IV}}_3\text{Mo}^{\text{VI}}_2\text{O}_{18}\text{py}_3]^{12-}$ . $[\text{Mo}^{\text{IV}}_3\text{Mo}^{\text{VI}}_2\text{O}_{18}\text{py}_3]^{12-}$ 

Level: B3LYP/LanL2DZ

56

|    |          |          |          |
|----|----------|----------|----------|
| Mo | 9.73474  | 5.60748  | 11.93136 |
| Mo | 9.52881  | 4.36655  | 9.77821  |
| Mo | 9.87568  | 6.83981  | 9.75880  |
| Mo | 8.79611  | 8.93434  | 12.71526 |
| Mo | 8.15726  | 2.52955  | 12.76640 |
| N  | 11.18827 | 5.50412  | 13.62718 |
| N  | 11.40390 | 8.14203  | 8.83636  |
| N  | 10.55859 | 2.64104  | 8.82367  |
| O  | 11.05944 | 6.85826  | 11.23105 |
| O  | 10.70556 | 4.04834  | 11.23431 |
| O  | 8.83279  | 7.12408  | 12.91219 |
| O  | 8.28126  | 5.79809  | 10.50191 |
| O  | 8.54437  | 4.29446  | 12.98091 |
| O  | 10.73587 | 5.44501  | 8.74950  |
| O  | 8.75690  | 7.32486  | 8.03632  |
| O  | 8.94720  | 8.60957  | 10.53745 |
| O  | 8.24785  | 4.28758  | 8.08347  |
| O  | 8.16276  | 2.95846  | 10.60527 |
| O  | 8.11533  | 9.47271  | 14.19875 |
| O  | 10.46206 | 9.35075  | 12.86921 |
| O  | 8.35379  | 10.77525 | 11.78176 |
| O  | 6.59468  | 8.69401  | 12.11342 |
| O  | 9.69117  | 1.79197  | 12.74445 |
| O  | 7.48803  | 2.04215  | 14.30084 |
| O  | 7.20896  | 0.91193  | 11.74730 |
| O  | 5.92669  | 3.19927  | 12.48660 |
| C  | 11.50317 | 4.36577  | 14.24372 |
| C  | 11.83759 | 6.63465  | 14.01342 |
| C  | 12.01239 | 9.09900  | 9.54175  |
| C  | 11.66332 | 8.06697  | 7.50356  |
| C  | 10.82994 | 1.52614  | 9.50911  |
| C  | 10.90530 | 2.70515  | 7.52170  |
| C  | 12.80951 | 6.62683  | 14.99625 |
| C  | 13.12538 | 5.43688  | 15.62547 |
| C  | 12.44696 | 4.28133  | 15.25012 |
| C  | 12.85995 | 10.02000 | 8.97055  |
| C  | 13.10606 | 9.95120  | 7.62324  |
| C  | 12.49246 | 8.98016  | 6.88703  |
| C  | 11.52138 | 1.64185  | 6.88522  |
| C  | 11.80857 | 0.48943  | 7.60330  |



|   |          |          |          |
|---|----------|----------|----------|
| C | 11.45085 | 0.43939  | 8.93610  |
| H | 11.61516 | 7.45722  | 13.59333 |
| H | 13.25793 | 7.42950  | 15.23450 |
| H | 13.79029 | 5.40994  | 16.30286 |
| H | 12.63029 | 3.45299  | 15.67657 |
| H | 11.05698 | 3.56992  | 13.97625 |
| H | 11.85349 | 9.14677  | 10.47804 |
| H | 13.26785 | 10.69378 | 9.50091  |
| H | 13.69592 | 10.56924 | 7.20988  |
| H | 12.63584 | 8.93408  | 5.94961  |
| H | 11.26803 | 7.37392  | 6.98867  |
| H | 10.72341 | 3.49679  | 7.02960  |
| H | 11.74538 | 1.69910  | 5.96403  |
| H | 12.24271 | -0.24704 | 7.18843  |
| H | 11.62945 | -0.33736 | 9.45291  |
| H | 10.58350 | 1.48319  | 10.42615 |

## References

- 1 A. Bino, F. A. Cotton and Z. Dori, *J. Am. Chem. Soc.*, 1978, **100**, 5252-5253.
- 2 S. F. Gheller, T. W. Hambley, R. T. C. Brownlee, M. J. O'Connor, M. R. Snow and A. G. Wedd, *J. Am. Chem. Soc.*, 1983, **105**, 1527-1532.
- 3 A. Birnbaum, F. A. Cotton, Z. Dori, D. O. Marler, G. M. Reisner, W. Schwotzer and M. Shaia, *Inorg. Chem.*, 1983, **22**, 2723-2726.
- 4 G. M. Sheldrick, *Acta Crystallogr. A*, 2015, **71**, 3-8.
- 5 R. Tsunashima, Y. Iwamoto, Y. Baba, C. Kato, K. Ichihashi, S. Nishihara, K. Inoue, K. Ishiguro, Y. F. Song and T. Akutagawa, *Angew. Chem. Int. Ed.*, 2014, **53**, 11228-11231.
- 6 A. D. Becke, *J. Chem. Phys.*, 1993, **98**, 5648-5652.
- 7 Gaussian 16, Revision A. 03, M. J. Frisch, G. W. Trucks, H. B. Schlegel, G. E. Scuseria, M. A. Robb, J. R. Cheeseman, V. B. G. Scalmani, G. A. Petersson, H. Nakatsuji, X. Li, M. Caricato, A. V. Marenich, J. Bloino, B. G. Janesko, R. Gomperts, B. Mennucci, H. P. Hratchian, J. V. Ortiz, A. F. Izmaylov, J. L. Sonnenberg, D. Williams-Young, F. Ding, F. Lipparini, F. Egidi, J. Goings, B. Peng, A. Petrone, T. Henderson, D. Ranasinghe, V. G. Zakrzewski, N. R. J. Gao, G. Zheng, W. Liang, M. Hada, M. Ehara, K. Toyota, R. Fukuda, J. Hasegawa, M. Ishida, T. Nakajima, Y. Honda, O. Kitao, H. Nakai, T. Vreven, K. Throssell, J. A. Montgomery, J. E. P. Jr., F. Ogliaro, M. J. Bearpark, J. J. Heyd, E. N. Brothers, K. N. Kudin, V. N. Staroverov, R. K. T. A. Keith, J. Normand, , K. Raghavachari, A. P. Rendell, J. C. Burant, S. S. Iyengar, J. Tomasi, M. Cossi, J. M. Millam, M. Klene, C. Adamo, R. Cammi, J. W. Ochterski, R. L. Martin, K. Morokuma, O. Farkas, J. B. Foresman and D. J. Fox, 2016.
- 8 P. J. Stephens, F. J. Devlin, C. F. Chabalowski and M. J. Frisch, *J. Phys. Chem.*, 1994, **98**, 11623-11627.
- 9 P. J. Hay and W. R. Wadt, *J. Chem. Phys.*, 1985, **82**, 270-283.
- 10 M. M. Francl, W. J. Pietro, W. J. Hehre, J. S. Binkley, M. S. Gordon, D. J. Defrees and J. A. Pople, *J. Chem. Phys.*, 1982, **77**, 3654-3665.
- 11 S. Wang, H. L. Li, S. Li, F. Liu, D. Q. Wu, X. L. Feng and L. X. Wu, *Chem.-Eur. J.*, 2013, **19**, 10895-10902.
- 12 F. C. Shen, Y. R. Wang, S. L. Li, J. Liu, L. Z. Dong, T. Wei, Y. C. Cui, X. L. Wu, Y. Xu and Y. Q. Lan, *J. Mater. Chem. A*, 2018, **6**, 1743-1750.
- 13 H. Wang, J. Isobe, T. Shimizu, D. Matsumura, T. Ina and H. Yoshikawa, *J. Power Sources*, 2017, **360**, 150-156.
- 14 J. J. Chen, M. D. Symes, S. C. Fan, M. S. Zheng, H. N. Miras, Q. F. Dong and L. Cronin, *Adv. Mater.*, 2015, **27**, 4649-4654.
- 15 N. Sonoyama, Y. Suganuma, T. Kume and Z. Quan, *J. Power Sources*, 2011, **196**, 6822-6827.
- 16 H. Wang, S. Hamanaka, Y. Nishimoto, S. Irle, T. Yokoyama, H. Yoshikawa and K. Awaga, *J. Am. Chem. Soc.*, 2012, **134**, 4918-4924.
- 17 H. Omachi, T. Inoue, S. Hatao, H. Shinohara, A. Criado, H. Yoshikawa, Z. Syrgiannis and M. Prato, *Angew. Chem. Int. Edit.*, 2020, **59**, 7836-7841.
- 18 J. L. Liu, Z. Chen, S. Chen, B. W. Zhang, J. Wang, H. H. Wang, B. B. Tian, M. H. Chen, X. F. Fan, Y. Z. Huang, T. C. Sum, J. Y. Lin and Z. X. Shen, *ACS Nano*, 2017, **11**, 6911-6920.
- 19 S. Uematsu, Z. Quan, Y. Suganuma and N. Sonoyama, *J. Power Sources*, 2012, **217**, 13-20.
